# Supplementary material for: Glycosmisines A and B: isolation of two new carbazole–indole-type dimeric alkaloids from Glycosmis pentaphylla and an evaluation of their antiproliferative activities
Source: Royal Society of Chemistry journal article supplement (doi:10.1039/c5ob00695c), 2015-01-01
Supplement: c5ob00695c1.pdf [file c5ob00695c1.pdf]

Glycosmisines A and B: isolation of two new carbazole-indole-type dimeric alkaloids from *Glycosmis pentaphylla* and an evaluation of their antiproliferative activities

Yu Chen <sup>a</sup>, Chu Tang <sup>b</sup>, Yi Wu <sup>b</sup>, Shasha Mo <sup>b</sup>, Sha Wang <sup>b</sup>, Guangzhong Yang <sup>a\*</sup>,  
Zhinan Mei <sup>a\*</sup>

<sup>a</sup>Address, College of Chemistry and Material Sciences, South Central University for Nationalities, 708 Minyuan Road, Wuhan 430074, P. R. China

<sup>b</sup>College of Pharmacy, South Central University for Nationalities, 708 Minyuan Road, Wuhan 430074, P. R. China

\* Correspondence to: Guangzhong Yang, E-mail: [yanggz888@126.com](mailto:yanggz888@126.com)

Zhinan Mei, E-mail: [meizhinan@163.com](mailto:meizhinan@163.com)

### Content

1. **Figure 1.** Spectra of compound **1** p2-5
2. **Figure 2.** Spectra of compound **2** p6-9

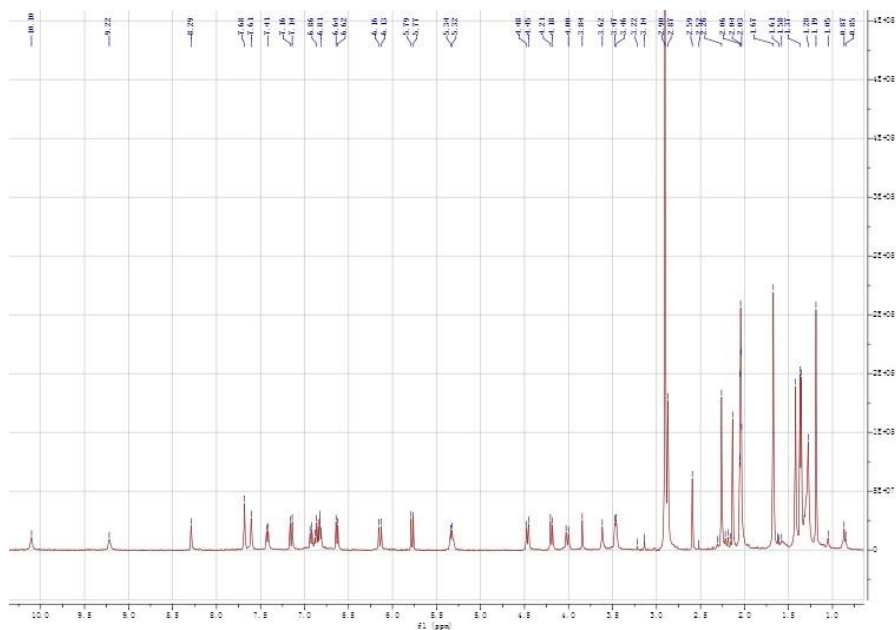

$^1\text{H}$  NMR spectrum of compound **1**

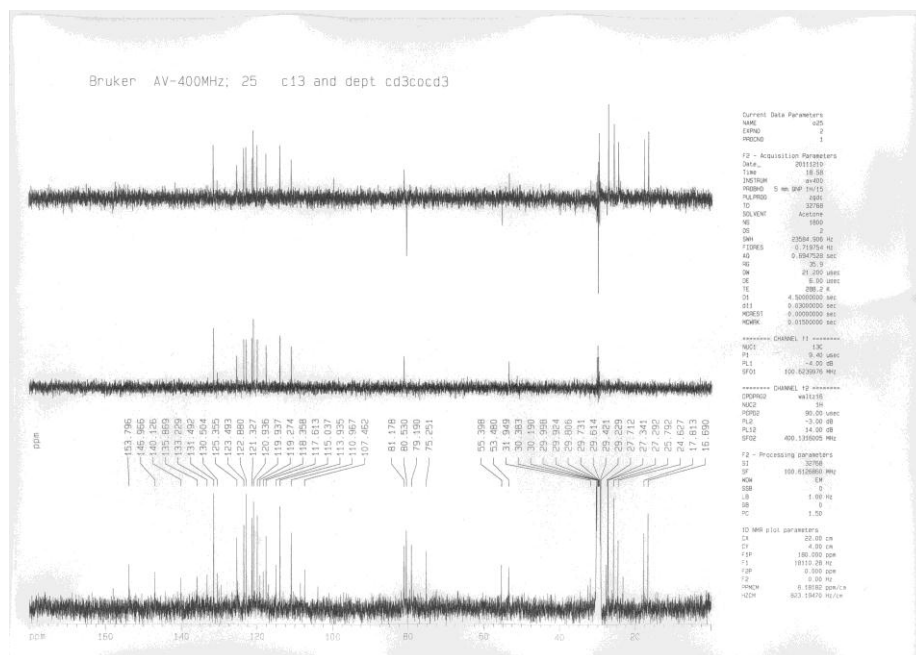

$^{13}\text{C}$  NMR spectrum of compound **1**

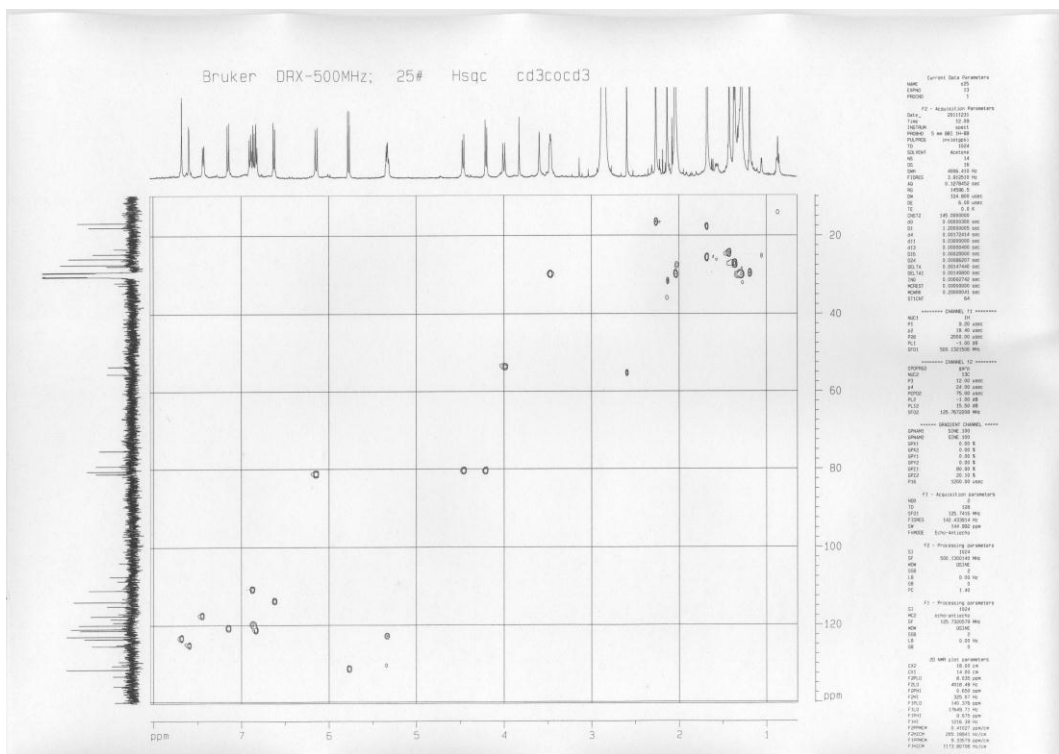

HSQC spectrum of compound 1

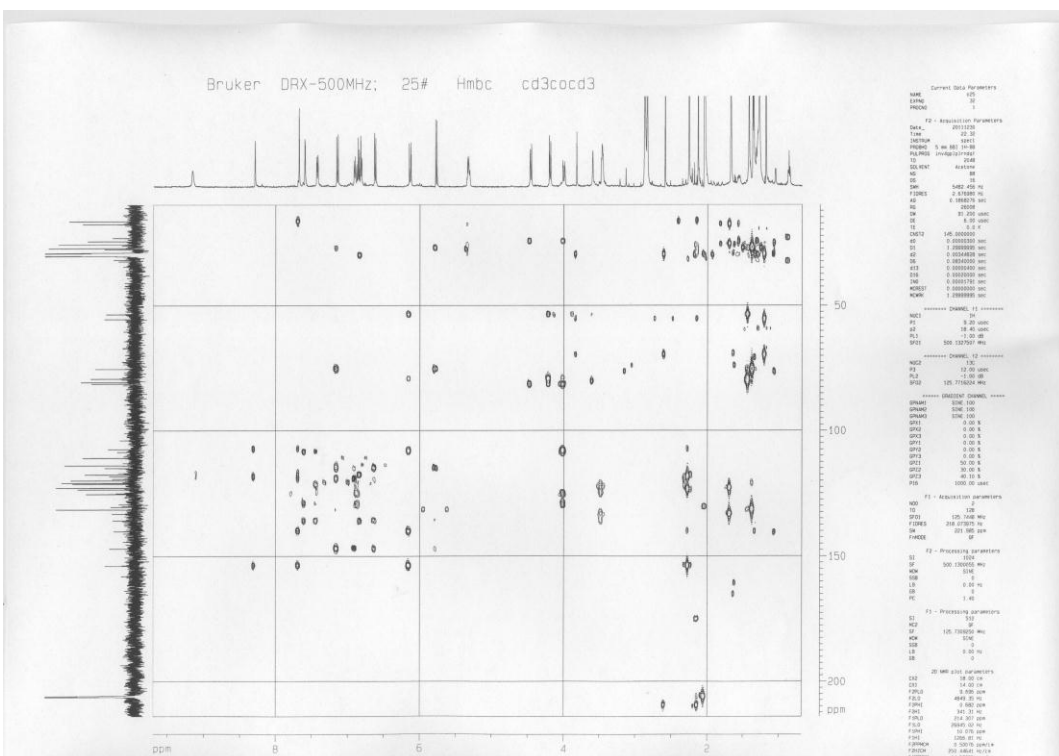

HMBC spectrum of compound 1

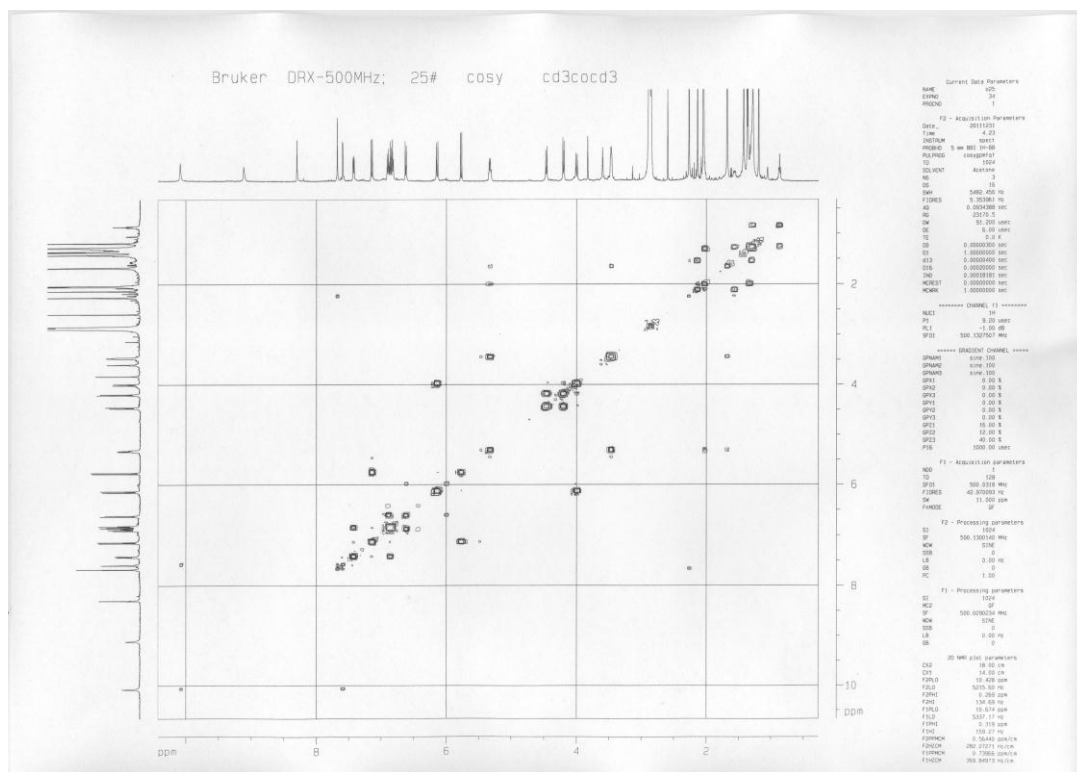

COSY spectrum of compound 1

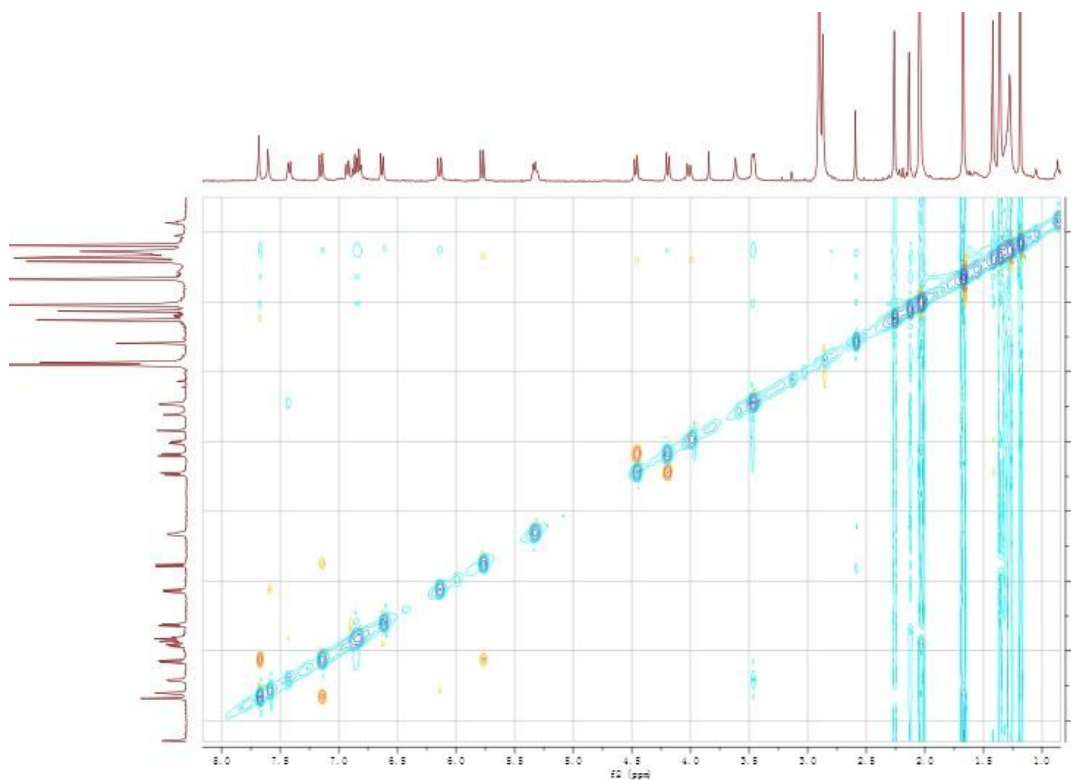

ROESY spectrum of compound 1

Single Mass Analysis (displaying only valid results)

Tolerance = 10.0 PPM / DBE: min = 0.5, max = 40.0

Selected filters: None

Monoisotopic Mass, Odd and Even Electron Ions

48 formula(e) evaluated with 1 results within limits (up to 51 closest results for each mass)

Elements Used:

C: 0-200 H: 0-400 N: 2-2 O: 0-8

wy25

11:14:58 02-Mar-2012

Voltage E1+

K1B  
M120302EA-01AFAMM 28 (2.570)  
562.2820

Autospec Premier  
P778  
7.17e4

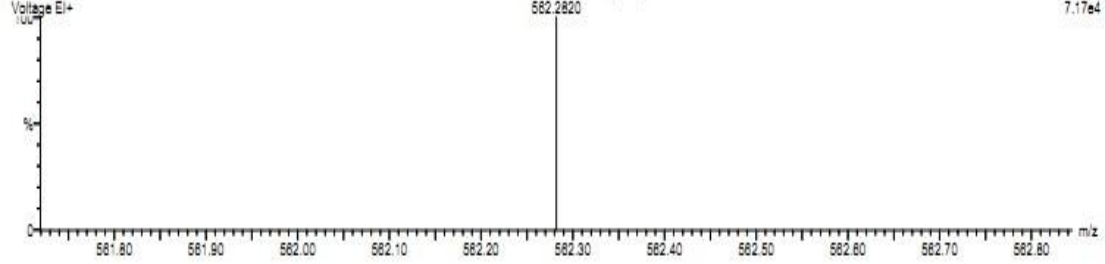

| Mass     | Calc. Mass | mDa  | PPM  | DBE  | i-FIT     | Formula       |
|----------|------------|------|------|------|-----------|---------------|
| 562.2820 | 562.2832   | -1.2 | -2.1 | 19.0 | 5591985.5 | C36 H38 N2 O4 |

HREIMS spectrum of compound 1

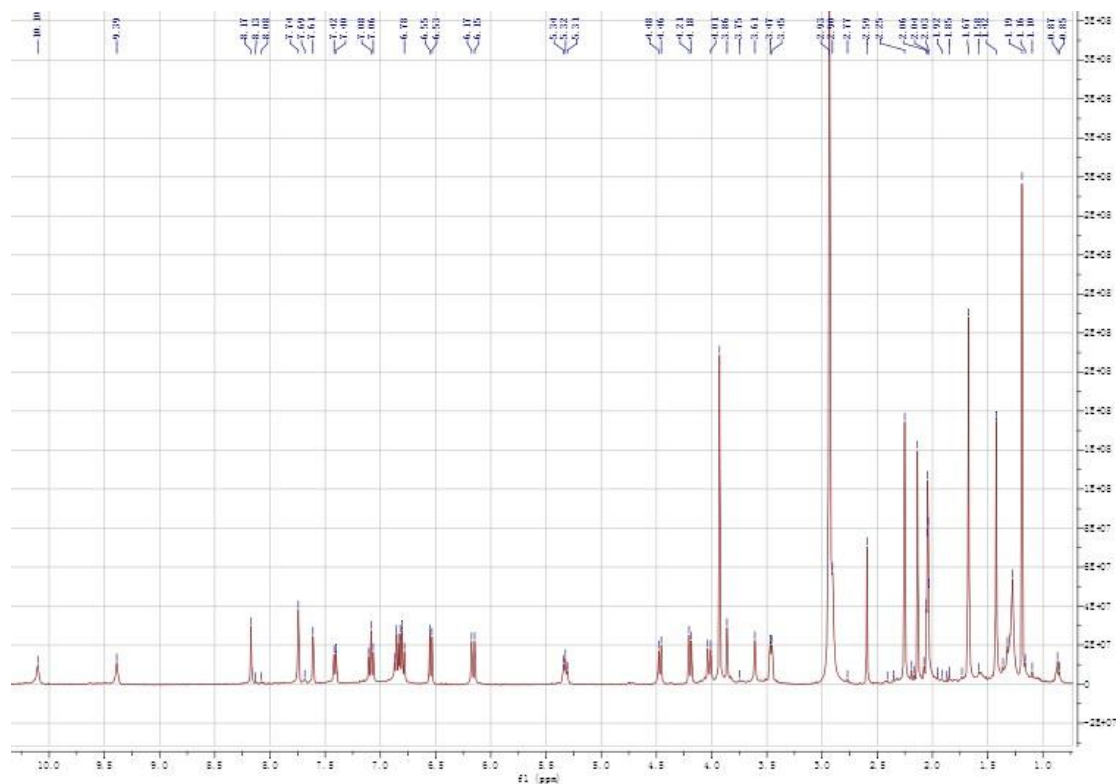

<sup>1</sup>H NMR spectrum of compound 2

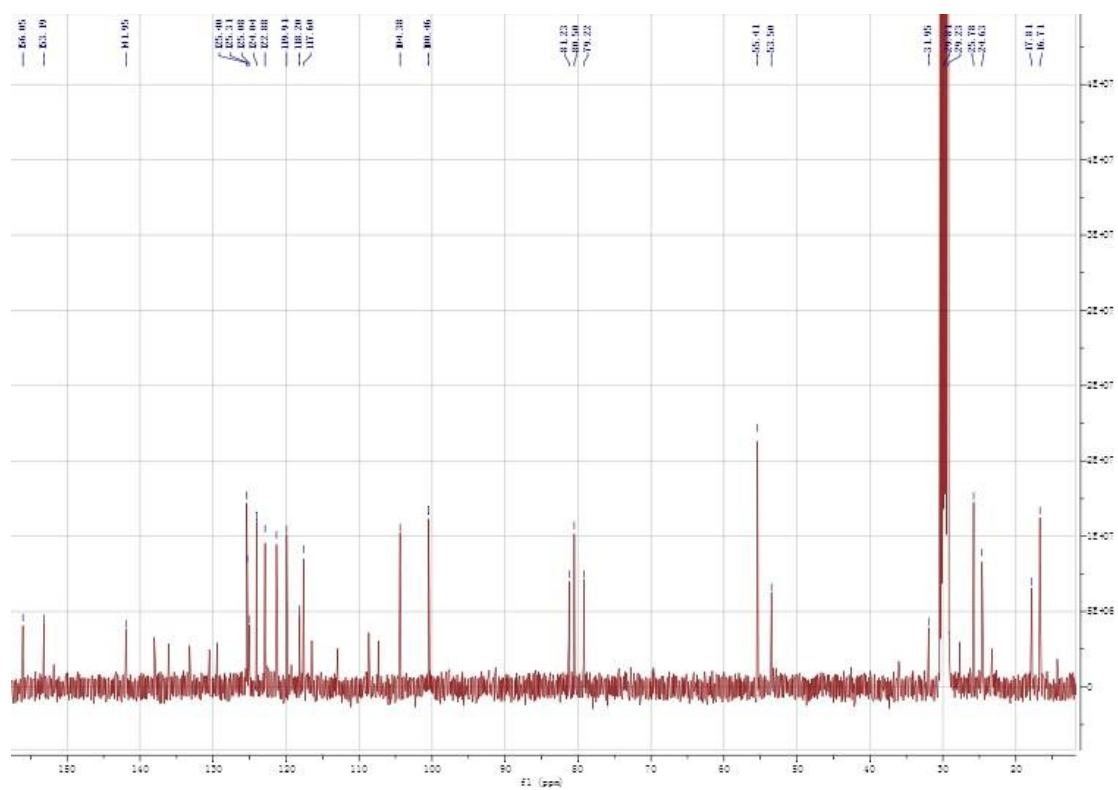

<sup>13</sup>C NMR spectrum of compound 2

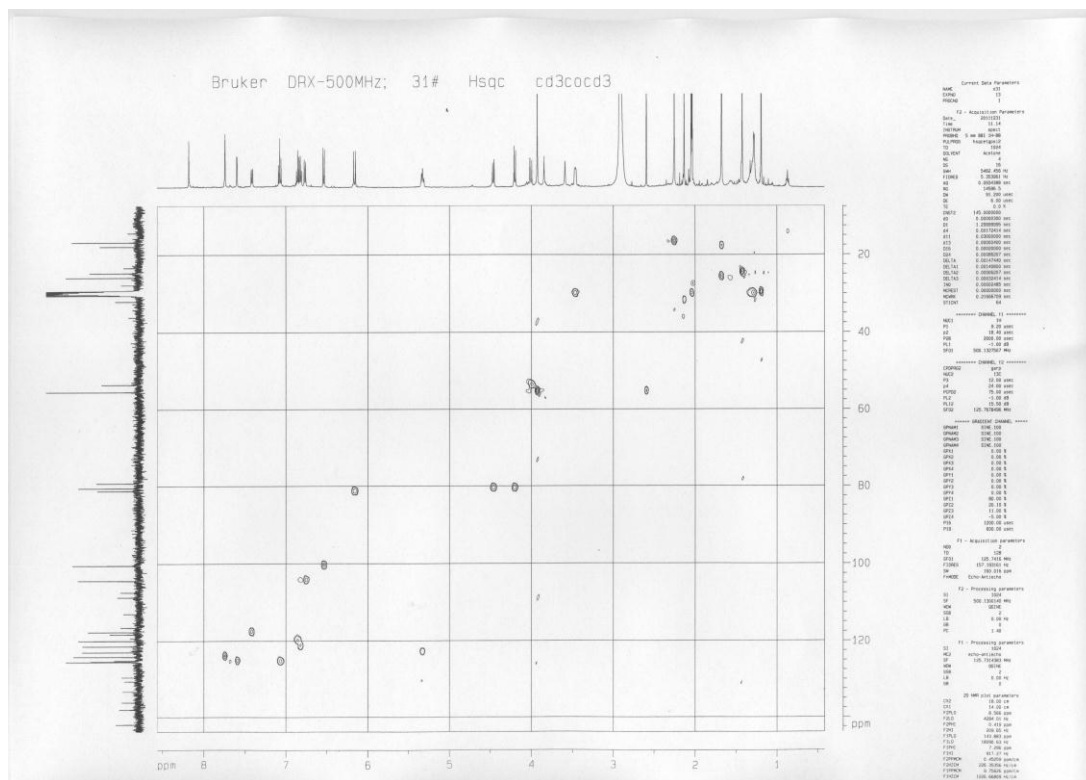

HSQC spectrum of compound 2

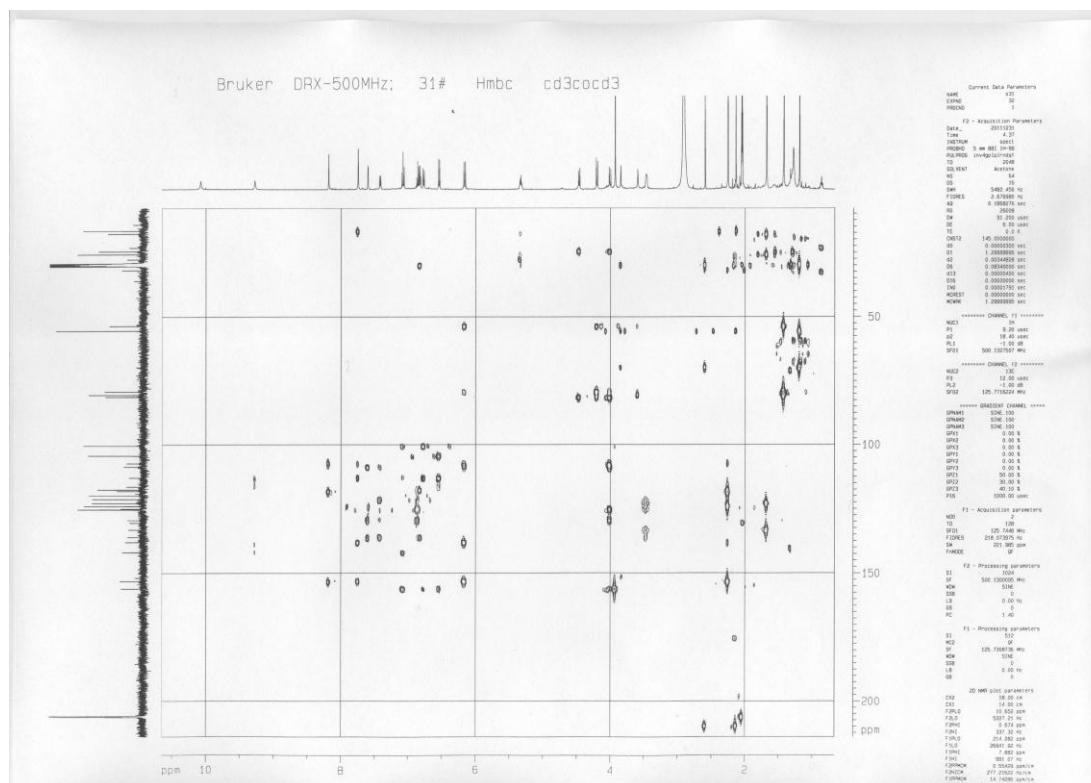

HMBC spectrum of compound 2

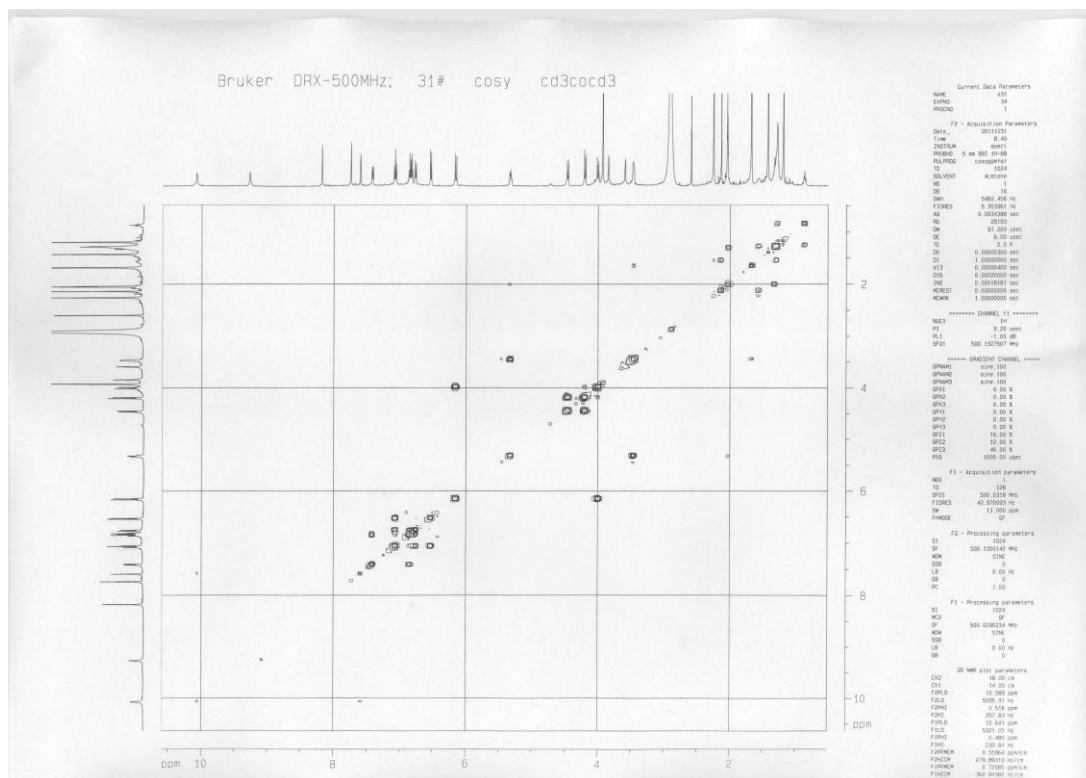

COSY spectrum of compound 2

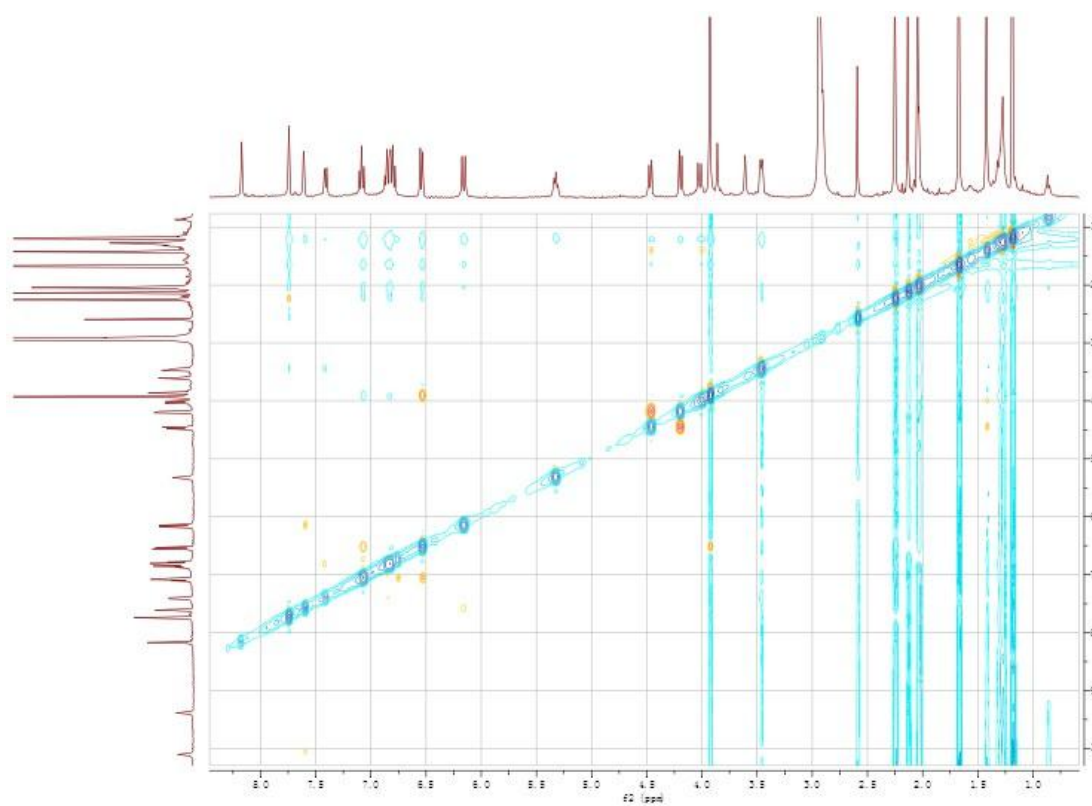

ROESY spectrum of compound 2



Single Mass Analysis (displaying only valid results)

Tolerance = 10.0 PPM / DBE: min = 0.5, max = 40.0

Selected filters: None

Monoisotopic Mass, Odd and Even Electron Ions

42 formula(e) evaluated with 1 results within limits (up to 51 closest results for each mass)

Elements Used:

C: 0-200 H: 0-400 N: 2-2 O: 0-8

xy-31

11:21:58 02-Mar-2012

Voltage EI+

K1B  
M120302EA-02AFAMM 13 (1.193)  
510.2523

Autospec Premier  
P778  
1.34e4

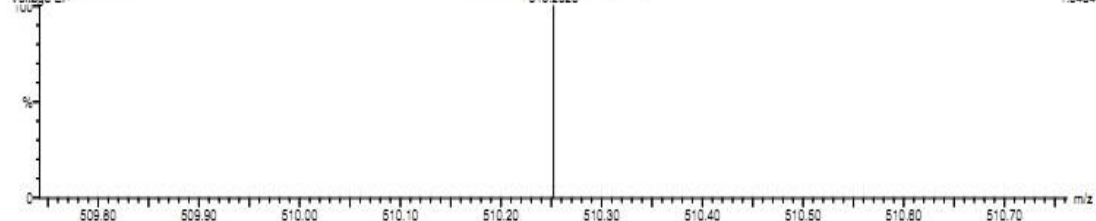

Minimum: 0.5  
Maximum: 500.0 10.0 40.0

| Mass     | Calc. Mass | mDa | PPM | DBE  | i-FIT     | Formula       |
|----------|------------|-----|-----|------|-----------|---------------|
| 510.2523 | 510.2519   | 0.4 | 0.8 | 17.0 | 5552728.5 | C32 H34 N2 O4 |

HR-EI-MS spectrum of compound 2
